# Supplementary material
Source: PubMed Central journal article supplement (PMC5349710)
Supplement: NIHMS849692-supplement-supplemental.pdf [file NIHMS849692-supplement-supplemental.pdf]

Supporting Information for

4-Hydroxy-7-oxo-5-heptenoic Acid (HOHA) Lactone

Induces Angiogenesis through Several Different

Molecular Pathways

*Junhong Guo<sup>1</sup>, Mikhail Linetsky<sup>1</sup>, Annabelle O. Yu<sup>2</sup>, Liang Zhang<sup>3</sup>, Scott J. Howell<sup>4</sup>, Heather J. Folkwein<sup>1</sup>, Hua Wang<sup>1</sup>, and Robert G. Salomon<sup>1\*</sup>*

<sup>1</sup>Department of Chemistry, Case Western Reserve University, Cleveland, Ohio, 44106, USA

<sup>2</sup>Department of Biology, Case Western Reserve University, Cleveland, Ohio, 44106, USA

<sup>3</sup>Department of Biochemistry, Case Western Reserve University, Cleveland, Ohio, 44106, USA

<sup>4</sup>Department of Ophthalmology and Visual Sciences, Case Western Reserve University, Cleveland, Ohio, 44106, USA

- To whom correspondence should be addressed at Department of Chemistry, Case Western Reserve University, Cleveland, Ohio 44106-7078; E-mail: [rgs@case.edu](mailto:rgs@case.edu), Phone: 216-368-2592. FAX: 216-368-3006

**Figure S1.** The pro-angiogenic effect of HOHA-lactone-GSH (-OH) on HUVECs in the wound-healing assay. S5

**Figure S2.** The pro-angiogenic effect of HOHA-lactone-GSH (=O) on HUVECs in the tube formation assay. S6

**Figure S3.** Effect of RPE conditioned medium on HUVECs in a tube formation assay in the absence and in the presence of Avastin (20  $\mu$ g/ml) or AAL-993 (100 nM). S7

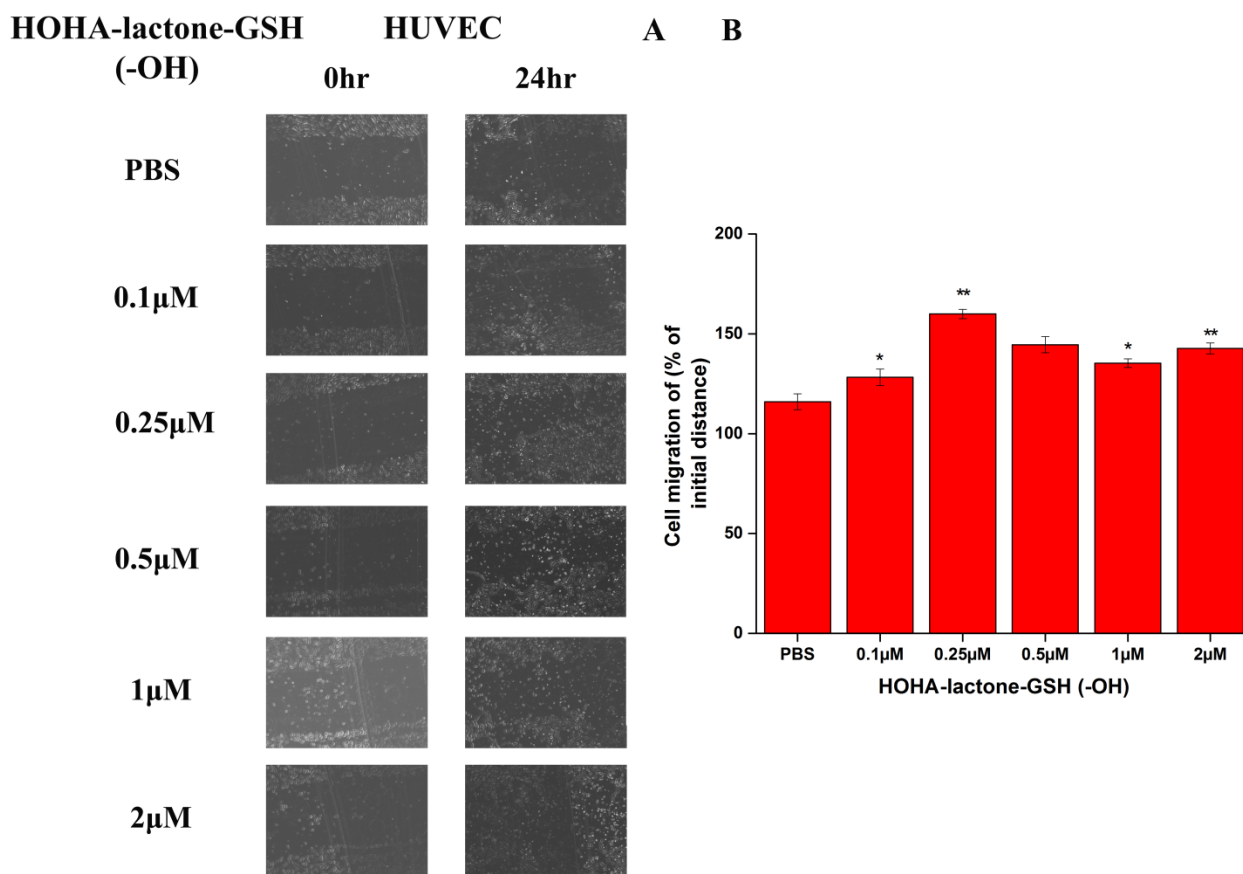

**Figure S1.** The pro-angiogenic effect of HOHA-lactone-GSH (-OH) on HUVECs in the wound healing assay. A: representative micrographs of cells with different treatment as indicated. B: quantification of wound healing assay. After HUVECs ( $1 \times 10^5$  cells in 300  $\mu$ l of a cell culture medium) formed a monolayer, they were scratched with a 200  $\mu$ L pipette tip. The cells were left in the medium for 24 h in the presence of various concentrations of HOHA-lactone-GSH (-OH) (0-2.0  $\mu$ M). The images are representative of four independent experiments showing very similar results. The data in bar graph represents the mean  $\pm$  SD (n = 4).

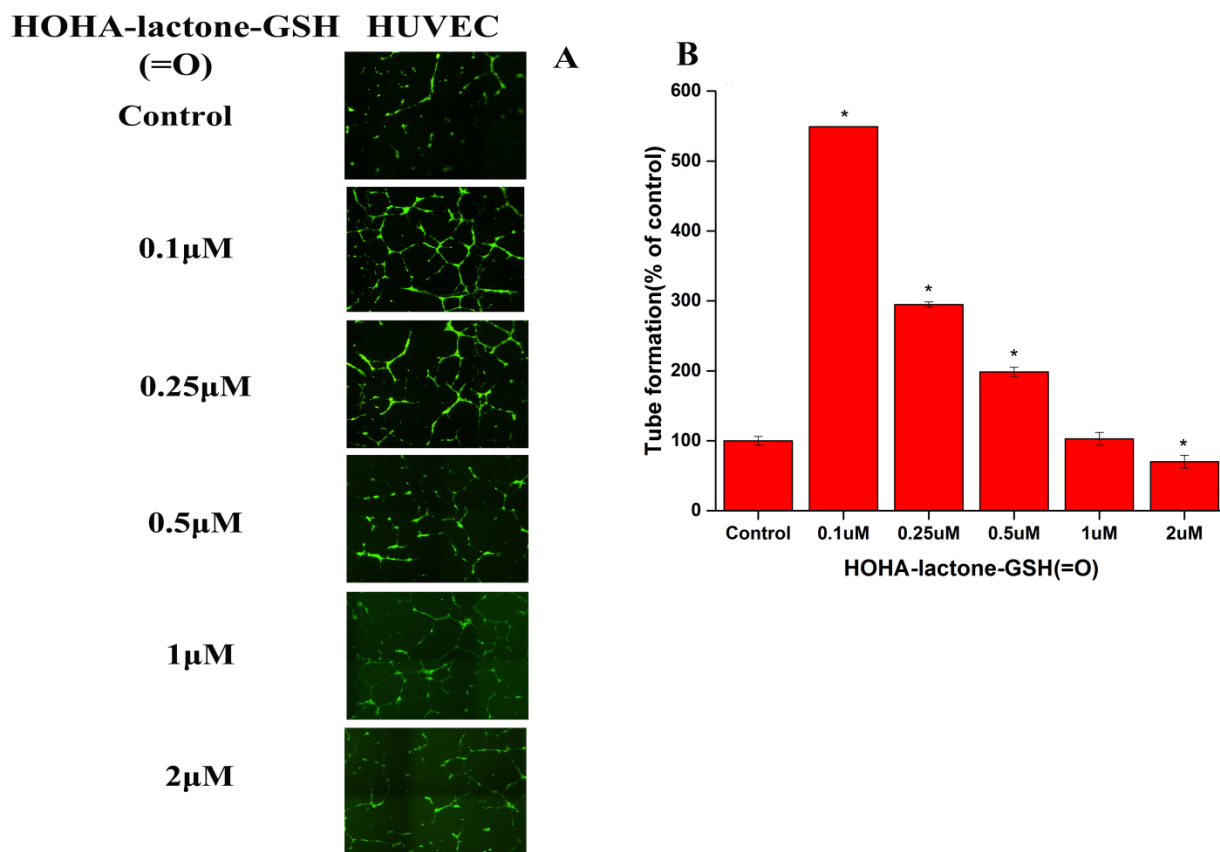

**Figure S2.** The pro-angiogenic effect of HOHA-lactone-GSH (=O) on HUVECs in the tube formation assay. A: representative micrographs of cells with different treatment as indicated. B: quantification of tube formation assay. HUVECs ( $2.5 \times 10^4$  cells/well) in 24-flat bottom tissue culture plate were allowed to grow on matrigel (175  $\mu$ L) for 4 h in presence of various concentrations of HOHA-lactone-GSH (=O) (0-2.0  $\mu$ M) for 16 h. The cells were stained with Calcein AM for 1 h at 37  $^{\circ}$ C in a CO<sub>2</sub> incubator. The images are representative of four experiments showing very similar results. The data in bar graph represents the mean  $\pm$  SD (n = 4).

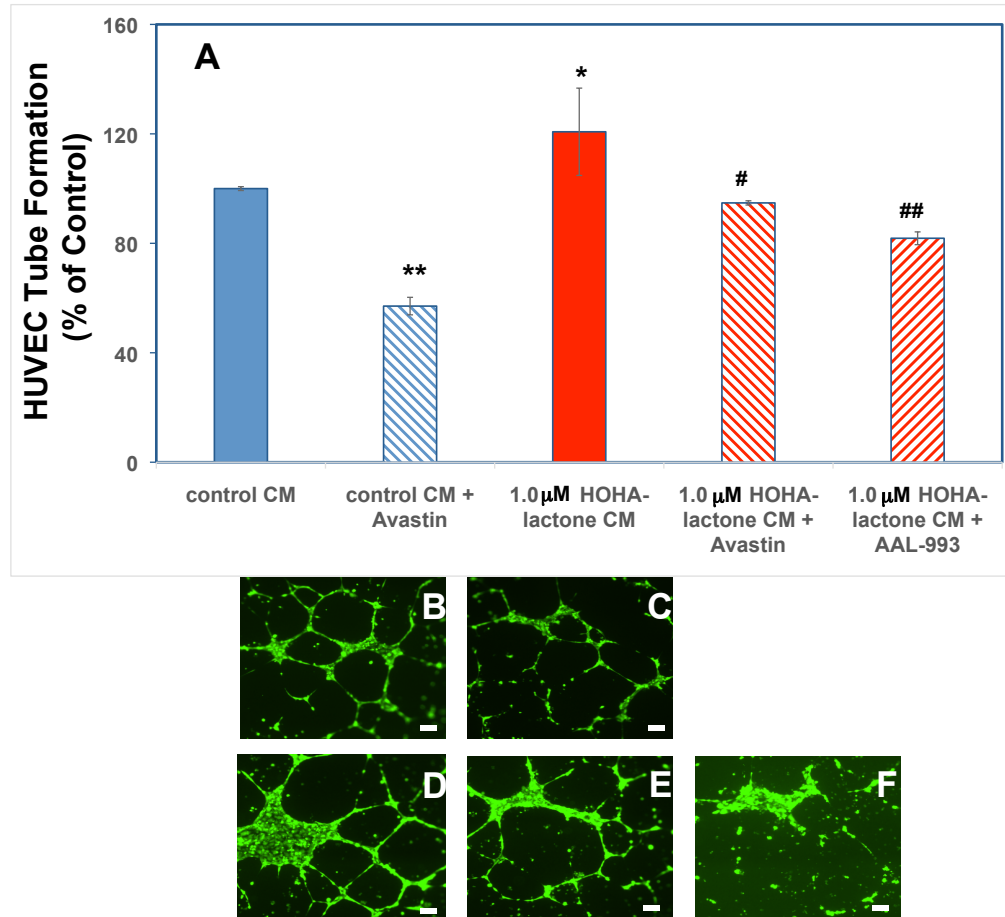

**Figure S3.** Effect of RPE conditioned medium (CM) on HUVEC in a tube formation assay in the absence and in the presence of Avastin (20  $\mu$ g/ml) or AAL-993 (100 nM), panel A. Representative fluorescence images of cells with various treatments as indicated. HUVEC ( $2.0 \times 10^4$  cells/well) in 24-flat bottom tissue culture plate were seeded on RGF-matrigel (175  $\mu$ L, approximately 15 mg/ml protein; 4 h) and then incubated with the CM, from ARPE-19 cells that had been challenged with 0 or 1  $\mu$ M of HOHA-lactone, that had or had not been pre-treated with Avastin (3h pre-incubation at room temperature) or with AAL-993 VEGFR kinase inhibitor for another 16 h. The cells were stained with Calcein AM for 1 h at 37  $^{\circ}$ C in a CO<sub>2</sub> incubator. The images are representative of three experiments showing very similar results (B) HUVE cells incubated with control ARPE-19 CM; (C) control ARPE-19 CM pre-treated with Avastin (20  $\mu$ g/mL); (D) 1  $\mu$ M HOHA-lactone CM; (E) 1  $\mu$ M HOHA-lactone CM pre-treated with Avastin; (F) 1  $\mu$ M HOHA-lactone CM and AAL-993 VEGFR kinase inhibitor). The data in the bar graph represents the mean  $\pm$  SD (n = 4); “\*\*\*” p<0.01, “#” p<0.01, “##” p<0.001 (for 1.0  $\mu$ M HOHA-lactone CM from ARPE-19 cells). Scale bars are 25.0  $\mu$ m.
